# Supplementary material for: POSS-ProDOT crosslinking of PEDOT
Source: Royal Society of Chemistry journal article supplement (doi:10.1039/c7tb00598a), 2017-01-01
Supplement: c7tb00598a1.pdf [file c7tb00598a1.pdf]

## Supporting Information

### POSS-ProDOT Crosslinking of PEDOT

Bin Wei, Jinglin Liu, Liangqi Ouyang, David C Martin\*

Department of Materials Science and Engineering, The University of Delaware, Newark,  
Delaware 19716

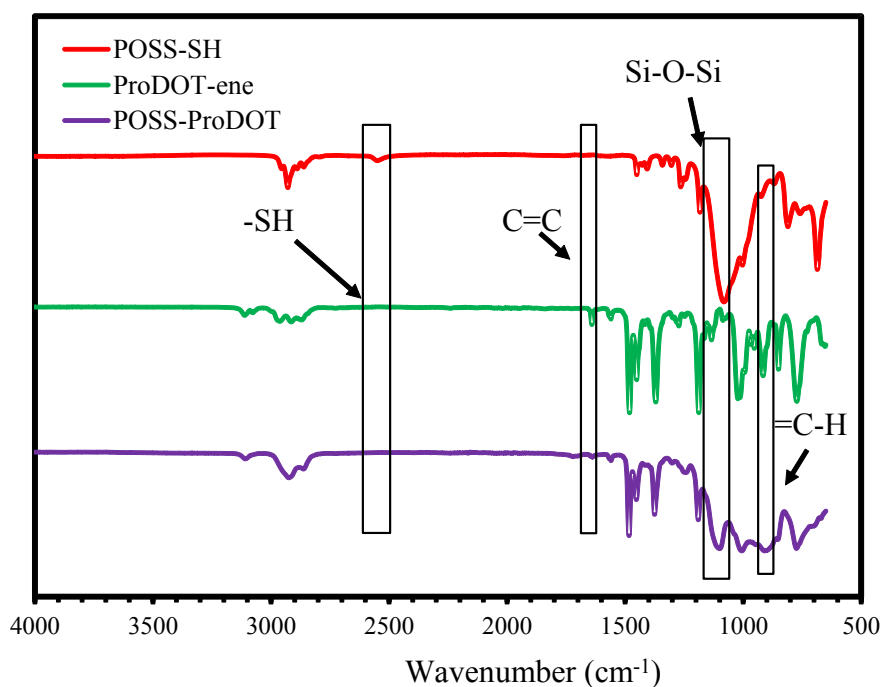

**Figure S1.** FTIR spectra. (a) ProDOT-ene, (b) POSS-SH and (c) POSS-ProDOT

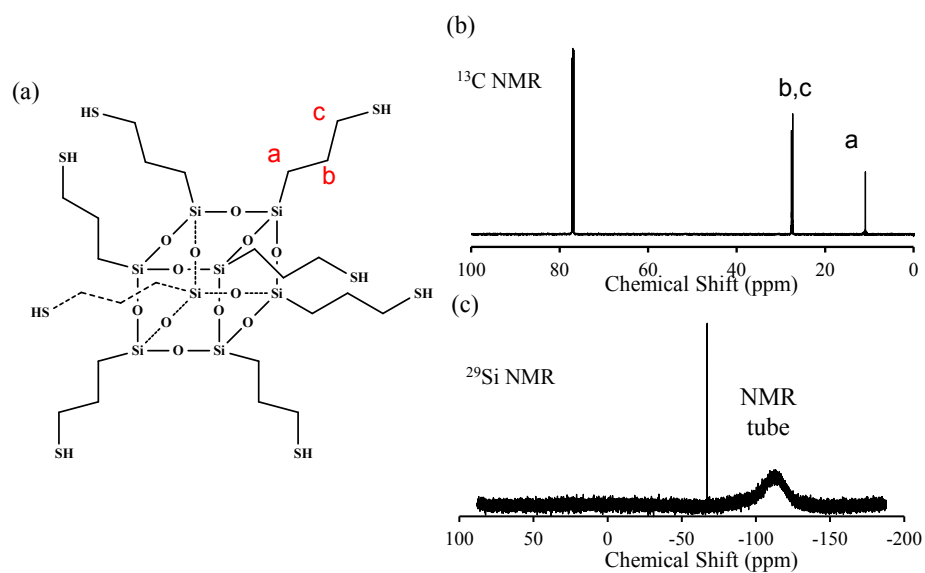

**Figure S2.**  $^{13}\text{C}$  and  $^{29}\text{Si}$  NMR spectra of POSS-SH. (a) Chemical structure of POSS-SH. (b)  $^{13}\text{C}$  NMR spectrum. (c)  $^{29}\text{Si}$  NMR indicated that the POSS-SH has a cubic structure.

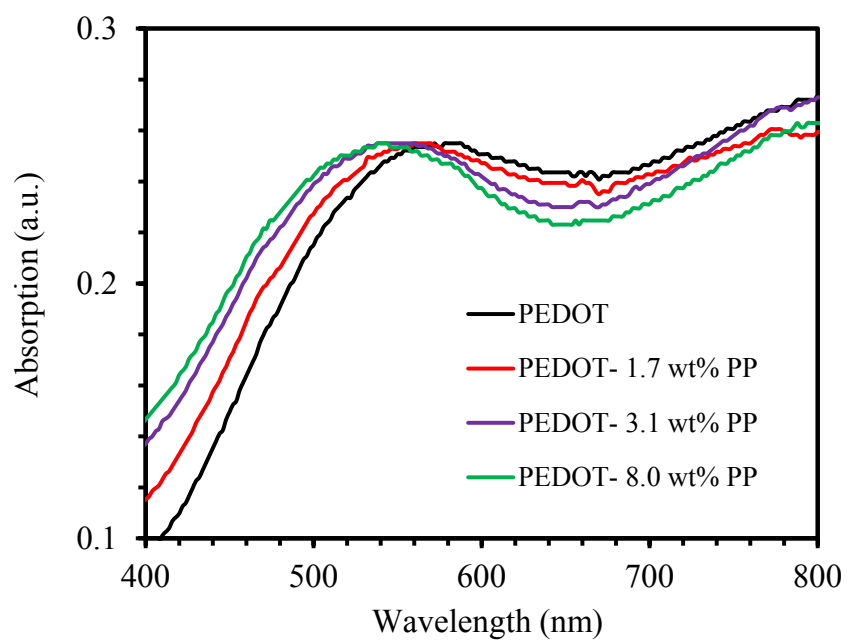

**Figure S3.** UV-vis absorption of PEDOT and copolymer films. POSS-ProDOT crosslinker could blue shift the adsorption of PEDOT films and the slight shift indicated that crosslinker does not significantly disrupt the overall conjugation of the PEDOT backbone.

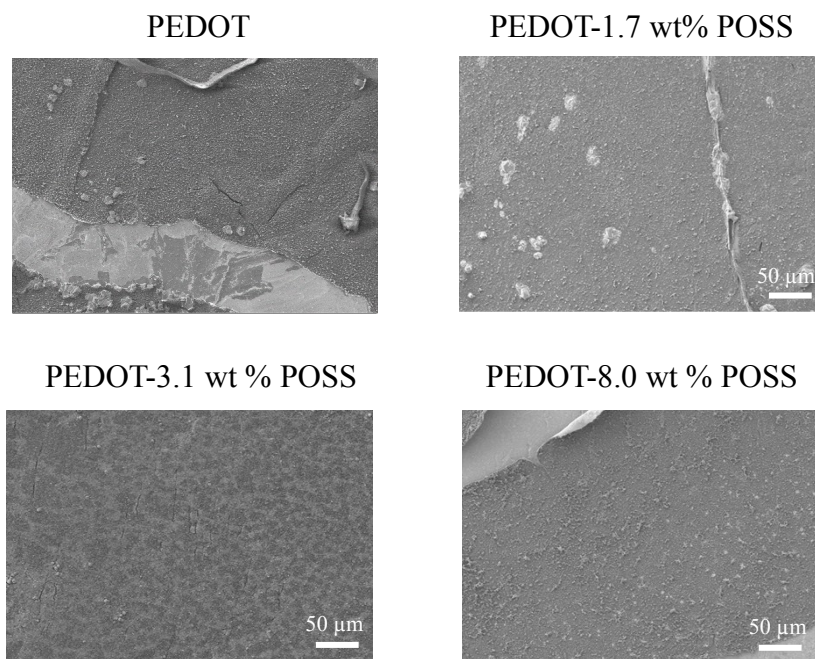

**Figure S4.** Morphologies of PEDOT and copolymer films after stability test at a higher magnification: (a) PEDOT film; (b) PEDOT film with 1.7 wt % crosslinker; (c) PEDOT with 3.1 wt % crosslinker; (d) PEDOT film with 8.0 wt % crosslinker. (Scale bar represents 50  $\mu\text{m}$ )

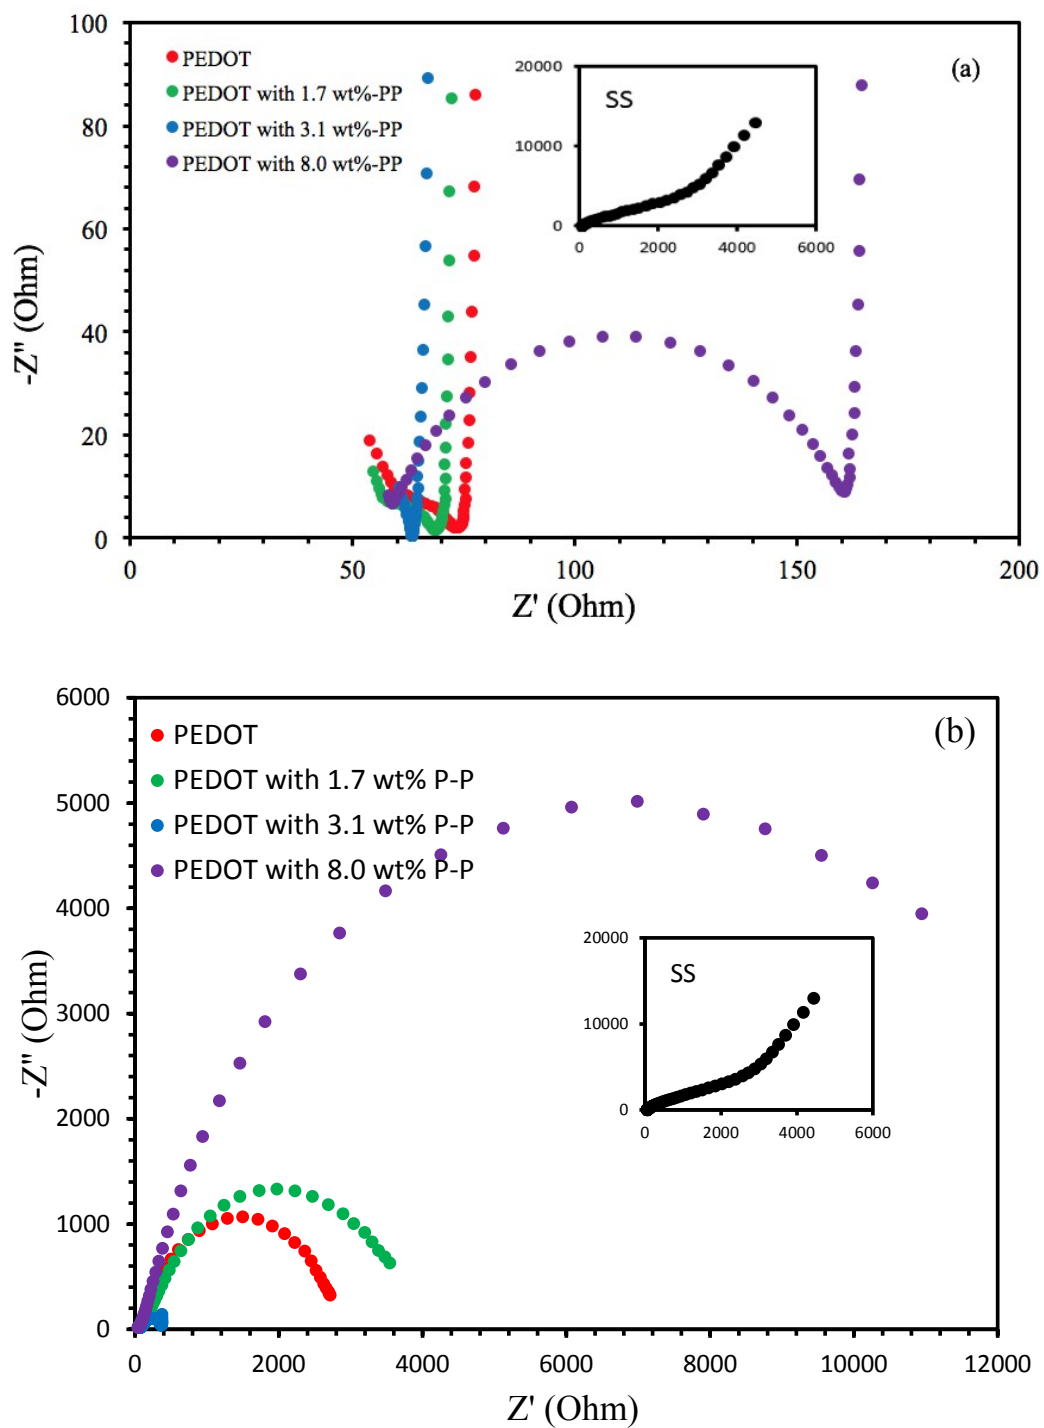

**Figure S5.** Nyquist plots of EIS of stainless steel, PEDOT and copolymer films deposited on stainless steel before (a) and after (b) stability tests.
